# Supplementary material for: A spatially efficient “tube-in-tube” hybrid for durable sulfur electrochemistry
Source: Royal Society of Chemistry journal article supplement (doi:10.1039/d1ta10181a), 2022-01-01
Supplement: d1ta10181a1.xlsx [file d1ta10181a1.xlsx]

## Sheet: Fe2Nz-x-NCT15
Pore Diameter (nm)	dV/dD Pore Volume (mm³/g·nm)
64.6394	1.03237
33.2918	8.44084
21.6442	11.5224
16.2728	12.0359
12.4448	12.3826
10.1777	12.3323
8.99956	12.2881
7.97597	11.9916
7.01821	12.0347
6.25322	11.4628
5.62778	11.6279
5.10034	10.7122
4.65002	10.7418
4.26022	10.2552
3.93441	59.8163
3.62746	18.9042
3.55992	17.2291
3.40593	17.7072
3.30003	18.4841
3.09802	19.261
2.78256	19.5598
2.54704	20.3367
2.37606	20.2769
2.12068	19.0219
2.06776	16.9303
2.08087	14.3606
1.84552	13.4044
1.62648	13.2251
1.50774	15.9143
1.34569	15.9143
1.26331	16.0339

## Sheet: Fe2Nz-x-NCT20
Pore Diameter (nm)	dV/dD Pore Volume (mm³/g·nm)
61.9358	1.25068
34.2283	13.0951
22.0361	18.2883
15.8115	19.809
12.6597	19.075
10.2208	17.9932
8.63693	16.5004
7.77021	15.3353
6.97745	14.3202
6.20983	13.9977
5.57986	12.8691
5.05184	11.9044
4.60117	11.5345
4.20974	10.9686
3.88396	62.2548
3.576	22.1409
3.40593	21.6633
3.36317	22.3805
3.2586	23.4562
2.94534	22.0817
2.74763	22.3207
2.51506	22.6793
2.3611	22.739
2.18873	21.5438
2.09405	18.1972
1.81087	16.6434
1.6681	15.747
1.50774	15.9861
1.39767	19.6315
1.29564	19.3327
1.17108	19.2729

## Sheet: Fe2Nz-x-NCT25
Pore Diameter (nm)	dV/dD Pore Volume (mm³/g·nm)
64.8161	0.85737
32.1726	12.924
21.9157	19.0912
15.5565	19.8448
12.3537	18.5085
10.6441	15.3238
9.18621	14.3201
7.91172	12.2196
6.93993	9.75392
6.17497	8.59947
5.54409	7.16372
5.01572	5.45206
4.56615	4.88245
4.17578	4.15519
3.84487	44.5045
3.53979	8.60774
3.45511	6.29048
3.45511	7.15714
3.23572	7.65238
2.95179	5.91905
2.65767	6.41429
2.36167	6.41429
2.21172	4.80476
2.07128	2.08095
1.84059	1.21429
1.70125	0.22381
1.55197	0.96667
1.43448	3.69048
1.30861	4.92857
1.19378	4.80476
1.08902	4.92857
