# Supplementary material for: A spatially efficient “tube-in-tube” hybrid for durable sulfur electrochemistry
Source: Royal Society of Chemistry journal article supplement (doi:10.1039/d1ta10181a), 2022-01-01
Supplement: d1ta10181a2.pdf [file d1ta10181a2.pdf]

## Supporting Information

Table S1. Comparisons of the synthesis details and electrochemical performance with serial carbonaceous sulfur hosts in lithium-sulfur batteries.

| Host                                               | Sulfur loading( $\text{mg}\cdot\text{cm}^{-2}$ )<br>or content (wt%) | Areal Capacity<br>( $\text{mAh}\cdot\text{cm}^{-2}$ ) | Capacity<br>( $\text{mAh}\cdot\text{g}^{-1}$ ) | Rate<br>(C) | Electrolyte/sulfur<br>ratio ( $\mu\text{L}\cdot\text{mg}^{-1}$ ) | Ref.      |
|----------------------------------------------------|----------------------------------------------------------------------|-------------------------------------------------------|------------------------------------------------|-------------|------------------------------------------------------------------|-----------|
| Co-NCFs                                            | 4.2 / 75                                                             | 4.5                                                   | 1071                                           | 0.5         | 15                                                               | 1         |
| NbC/Co-CFs                                         | 1.5 / 80                                                             | 2.2                                                   | 1466                                           | 0.1         | 10                                                               | 2         |
| VN-NC                                              | 7.1 / 75                                                             | 4.8                                                   | 676                                            | 0.05        | 10                                                               | 3         |
| MoN-C                                              | 1.2 / 75                                                             | 1.92                                                  | 1600                                           | 0.2         | 6.5                                                              | 4         |
| ePCNTM-20                                          | 2.0 / 75                                                             | 2.13                                                  | 1065                                           | 0.1         | 15                                                               | 5         |
| $\text{Fe}_2\text{N}_{1-x}$ -<br>NCT <sub>25</sub> | 5.1 / 90                                                             | 5.26                                                  | 1031                                           | 0.1         | 10                                                               | This work |
| $\text{Fe}_2\text{N}_{1-x}$ -<br>NCT <sub>25</sub> | 5.1 / 90                                                             | 4.19                                                  | 821                                            | 0.1         | 8                                                                | This work |
| $\text{Fe}_2\text{N}_{1-x}$ -<br>NCT <sub>25</sub> | 5.1 / 90                                                             | 3.38                                                  | 662                                            | 0.1         | 5                                                                | This work |

Table S2: The detailed content of various sulfur contained cathode in this work.

| Cathode                                                              | Sulfur  | Host    | PVDF binder | Aluminum foil<br>( $\Phi=12\text{mm}$ ) |
|----------------------------------------------------------------------|---------|---------|-------------|-----------------------------------------|
| NCT <sub>25</sub>                                                    | 2.26 mg | 0.96 mg | 0.36 mg     |                                         |
| Fe <sub>2</sub> N <sub>1-x</sub> -NCT <sub>15</sub>                  | 2.31 mg | 0.99 mg | 0.37 mg     |                                         |
| Fe <sub>2</sub> N <sub>1-x</sub> -NCT <sub>20</sub>                  | 2.23 mg | 0.95 mg | 0.35 mg     | 4.83 mg                                 |
| Fe <sub>2</sub> N <sub>1-x</sub> -NCT <sub>25</sub>                  | 2.35 mg | 1.00 mg | 0.37 mg     |                                         |
| High-loading Fe <sub>2</sub> N <sub>1-x</sub> -<br>NCT <sub>25</sub> | 5.76 mg | 0.64 mg | 0.71 mg     |                                         |

Table S3: Summary of textural parameters of the obtained Fe<sub>2</sub>N<sub>1-x</sub>-NCT samples.

| Samples                                                 | S <sub>BET</sub><br>(m <sup>2</sup> g <sup>-1</sup> ) | S <sub>Meso</sub><br>(m <sup>2</sup> g <sup>-1</sup> ) | S <sub>Micro</sub><br>(m <sup>2</sup> g <sup>-1</sup> ) | V <sub>t</sub><br>(cm <sup>3</sup> g <sup>-1</sup> ) | V <sub>Meso</sub><br>(cm <sup>3</sup> g <sup>-1</sup> ) | V <sub>micro</sub><br>(cm <sup>3</sup> g <sup>-1</sup> ) |
|---------------------------------------------------------|-------------------------------------------------------|--------------------------------------------------------|---------------------------------------------------------|------------------------------------------------------|---------------------------------------------------------|----------------------------------------------------------|
| Fe <sub>2</sub> N <sub>1-x</sub> -<br>NCT <sub>15</sub> | 120                                                   | 21                                                     | 99                                                      | 0.20                                                 | 0.12                                                    | 0.08                                                     |
| Fe <sub>2</sub> N <sub>1-x</sub> -<br>NCT <sub>20</sub> | 263                                                   | 161                                                    | 102                                                     | 0.25                                                 | 0.15                                                    | 0.10                                                     |
| Fe <sub>2</sub> N <sub>1-x</sub> -<br>NCT <sub>25</sub> | 312                                                   | 202                                                    | 110                                                     | 0.30                                                 | 0.19                                                    | 0.11                                                     |

S<sub>BET</sub>: total BET specific surface area, S<sub>Meso</sub>: mesopore specific surface area, S<sub>Micro</sub>: micropore specific surface area, V<sub>t</sub>: total pore volume, V<sub>Meso</sub>: mesoporous volume, V<sub>Micro</sub>: microporous volume.

Table S4: Summarized XPS data for polystyrene-ferrocene/polydopamine-Fe<sup>3+</sup> (PS-Fe/PDA-Fe<sup>3+</sup>) fibers in Fig. S2a. Fe 2p binding energies (eV) for selected iron species are provided.

| Samples                           | Sat.  | Porphyrin Fe 2p <sub>1/2</sub> | Sat.  | Porphyrin Fe 2p <sub>3/2</sub> |
|-----------------------------------|-------|--------------------------------|-------|--------------------------------|
| PS-Fe/PDA-Fe <sup>3+</sup> fibers | 727.8 | 723.7                          | 715.4 | 710.8                          |

Table S5: Summarized XPS data for  $\text{NCT}_{25}$  and  $\text{Fe}_2\text{N}_{1-x}\text{-NCT}_{25}$  in Fig. 3e. N 1s binding energies (eV) for selected nitrogen species are provided.

| Samples                                     | Oxidized N | Graphite N | Pyrrole N | Fe-N  | Pyridinic N |
|---------------------------------------------|------------|------------|-----------|-------|-------------|
| $\text{Fe}_2\text{N}_{1-x}\text{-NCT}_{25}$ | 402.8      | 401.1      | 400.0     | 398.6 | 398.0       |
| $\text{NCT}_{25}$                           | 402.8      | 401.2      | 400.2     | /     | 398.2       |

Table S6: Summarized XPS data for Fe<sub>2</sub>N<sub>1-x</sub>-NCT<sub>25</sub> in Fig. 3f. Fe 2p binding energies (eV) for selected iron species at different depth are provided.

| Samples                                                                   | Sat.  | Fe <sup>2+</sup>  | Fe <sup>0</sup>   | Sat.  | Fe <sup>2+</sup>  | Fe <sup>0</sup>   | Fe/N |
|---------------------------------------------------------------------------|-------|-------------------|-------------------|-------|-------------------|-------------------|------|
|                                                                           |       | 2p <sub>1/2</sub> | 2p <sub>1/2</sub> |       | 2p <sub>3/2</sub> | 2p <sub>3/2</sub> |      |
| Surface of Fe <sub>2</sub> N <sub>1-x</sub> -NCT <sub>25</sub>            | 727.0 | 725.1             | 722.2             | 400.0 | 716.8             | 709.1             | 1.98 |
| 50 nm depth of of Fe <sub>2</sub> N <sub>1-x</sub> -<br>NCT <sub>25</sub> | 726.9 | 724.8             | /                 | 400.2 | 715.5             | /                 | 1.74 |

Table S7: Summarized XPS data for NCT<sub>25</sub>/Li<sub>2</sub>S<sub>6</sub> in Fig. 4e. S 2p binding energies (eV) for selected sulfur species are provided.

| Samples           | Sulfate     | S <sub>B</sub> <sup>0</sup> | S <sub>T</sub> <sup>-1</sup> |
|-------------------|-------------|-----------------------------|------------------------------|
| Blank             | /           | 164.6/163.6                 | 163.2/162.3                  |
| NCT <sub>25</sub> | 168.5/166.7 | 164.4/163.9                 | 163.2/162.7                  |

Table S8: Summarized XPS data for  $\text{Fe}_2\text{N}_{1-x}\text{-NCT}_{25}/\text{Li}_2\text{S}_6$  in Fig. 4f. S 2p binding energies (eV) for selected sulfur species are provided.

| Samples                                     | Sulfate     | $\text{S}_\text{B}^0$ | $\text{S}_\text{T}^{-1}$ |
|---------------------------------------------|-------------|-----------------------|--------------------------|
| Blank                                       | /           | 164.6/163.6           | 163.2/162.3              |
| $\text{Fe}_2\text{N}_{1-x}\text{-NCT}_{25}$ | 168.7/166.9 | 165.0/164.1           | 163.7/163.3              |



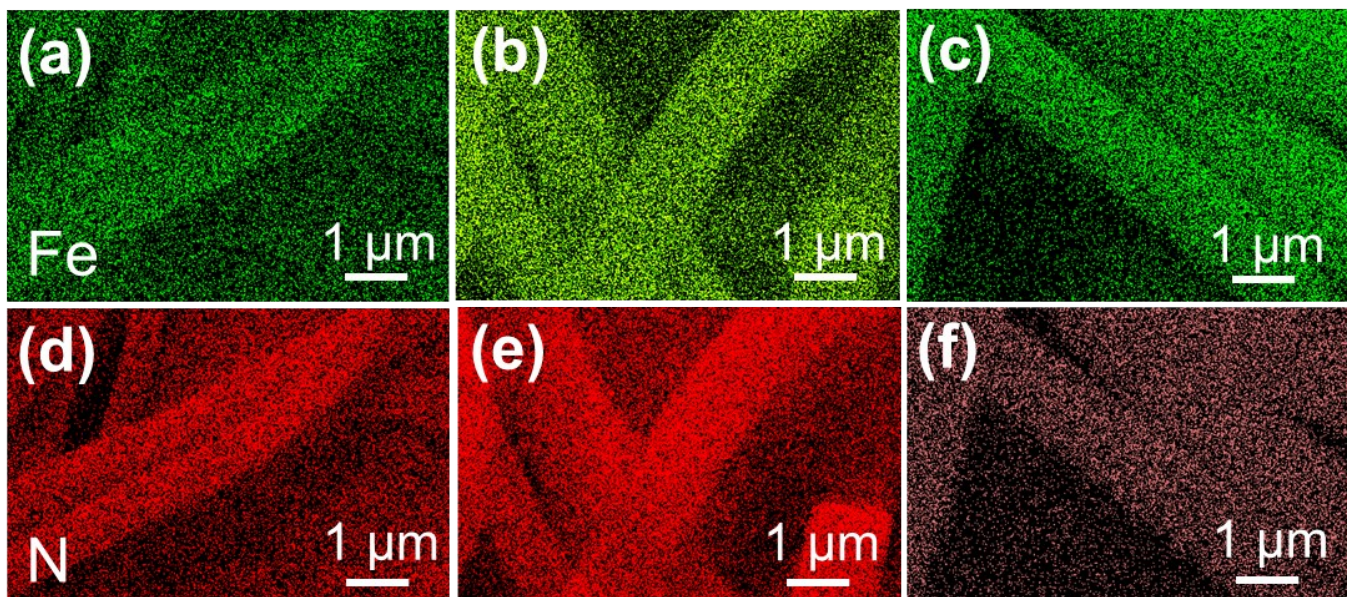

Figure S1. Corresponding elemental mapping images of Figure 1b, 1f, and 1j.

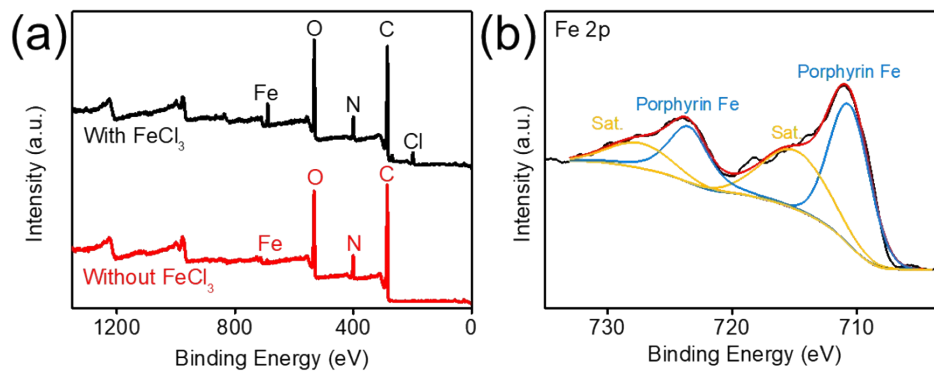

Figure S2. (a) The XPS survey spectra and the high-resolution XPS spectra of (b) Fe 2p for polystyrene-ferrocene/polydopamine-Fe<sup>3+</sup> fibers.

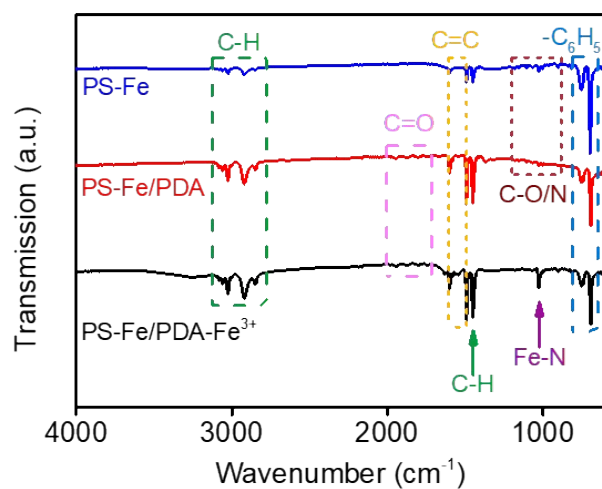

Figure S3. FT-IR patterns of polystyrene-ferrocene fibers, polystyrene-ferrocene/polydopamine fibers, and polystyrene-ferrocene/polydopamine-Fe<sup>3+</sup> fibers.

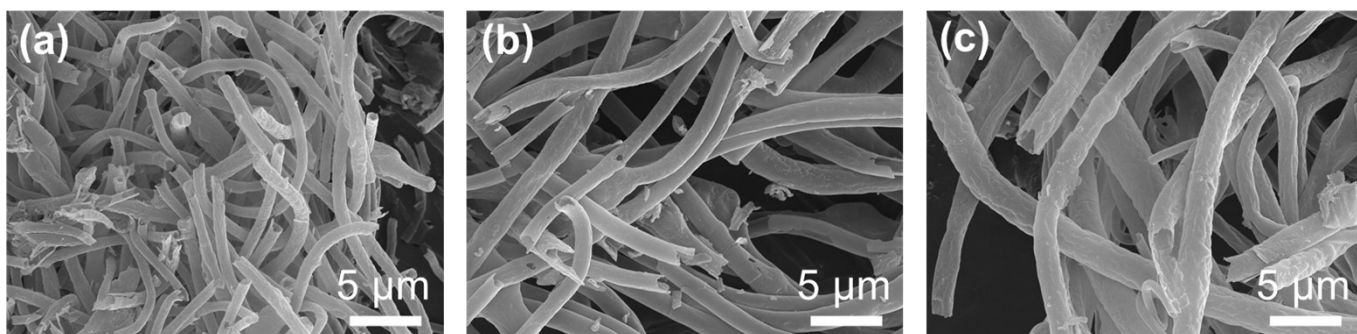

Figure S4. Low-magnification SEM images of  $\text{Fe}_2\text{N}_{1-x}$ -NCT samples at a polystyrene concentration of (a) 15 wt%, (b) 20 wt%, and (c) 25 wt%.

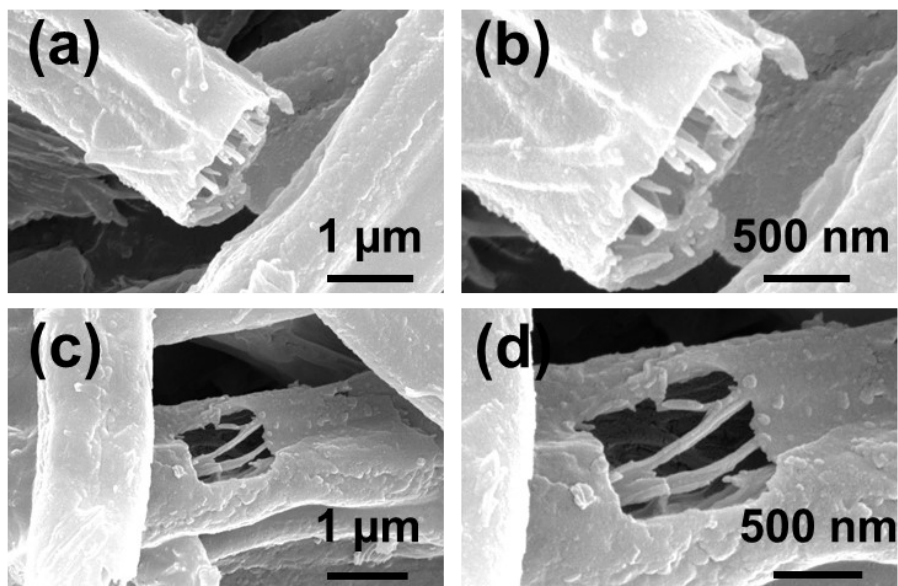

Figure S5. High-magnification SEM images of  $\text{Fe}_2\text{N}_{1-x}\text{-NCT}_{25}$  samples at a polystyrene concentration of 25 wt%.

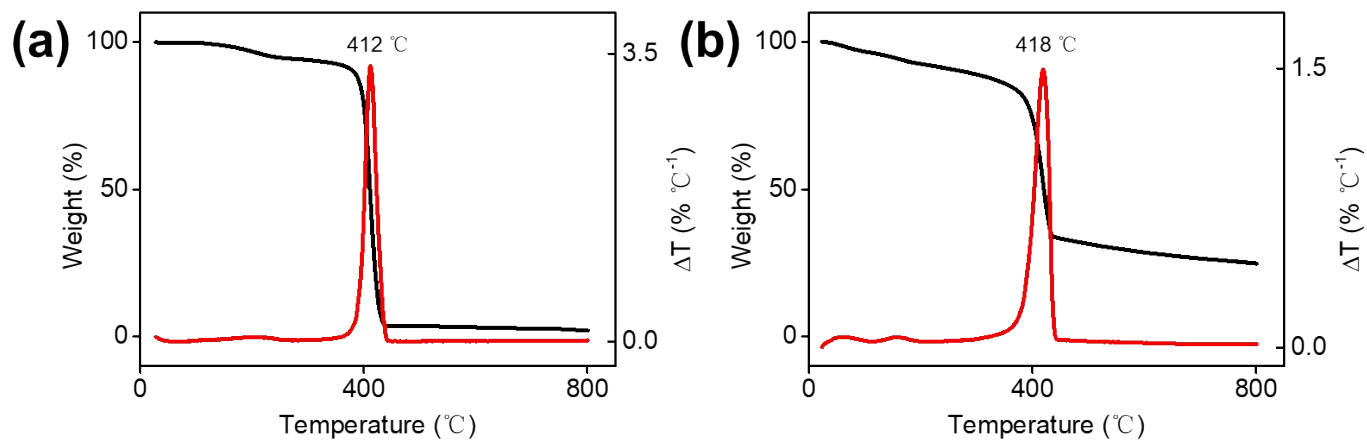

Figure S6. TG/DSC curves of (a) polystyrene-ferrocene fibers and (b) polystyrene-ferrocene/polydopamine-Fe<sup>3+</sup> fibers.

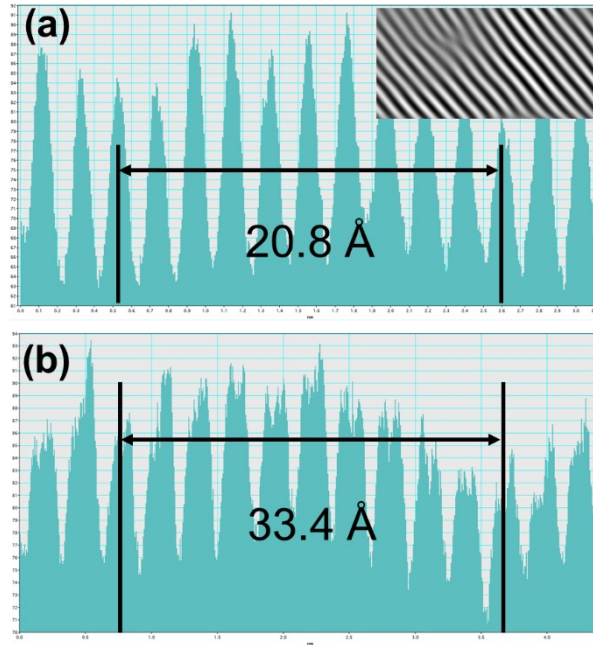

Figure S7. The IFFT patterns of (a)  $\text{Fe}_2\text{N}_{1-x}$  nanocrystal and (b) graphene layer.

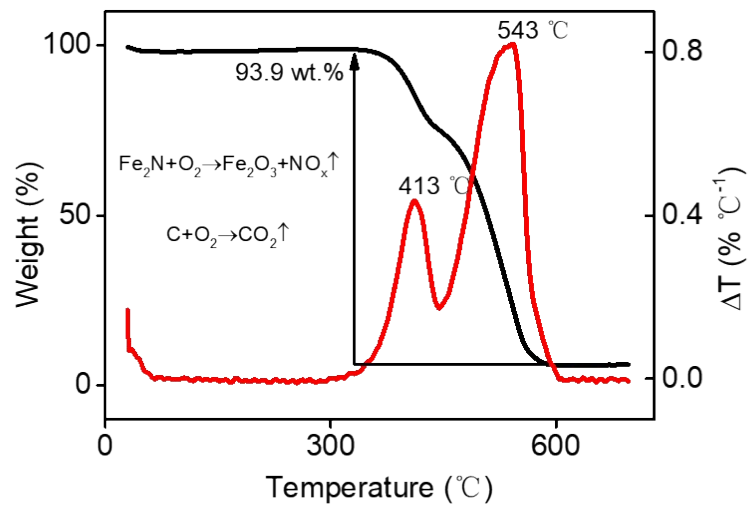

$$W(\text{Fe}_2\text{O}_3) = 100\% - W(\text{C}) = 6.1 \%$$

$$W(\text{Fe}_2\text{N}) = \frac{M(\text{Fe}_2\text{N})}{M(\text{Fe}_2\text{O}_3)} \cdot W(\text{Fe}_2\text{O}_3) = 4.8 \%$$

Figure S8. TG/DSC curves of  $\text{Fe}_2\text{N}_{1-x}\text{-NCT}_{25}$  sample.



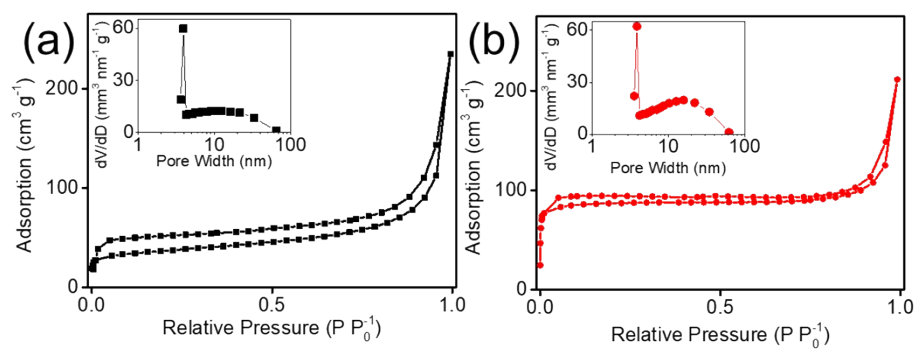

Figure S9. N<sub>2</sub> adsorption/desorption isotherm curve and pore distribution (inset) of (a) Fe<sub>2</sub>N<sub>1-x</sub>-NCT<sub>15</sub> and (b) Fe<sub>2</sub>N<sub>1-x</sub>-NCT<sub>20</sub>.

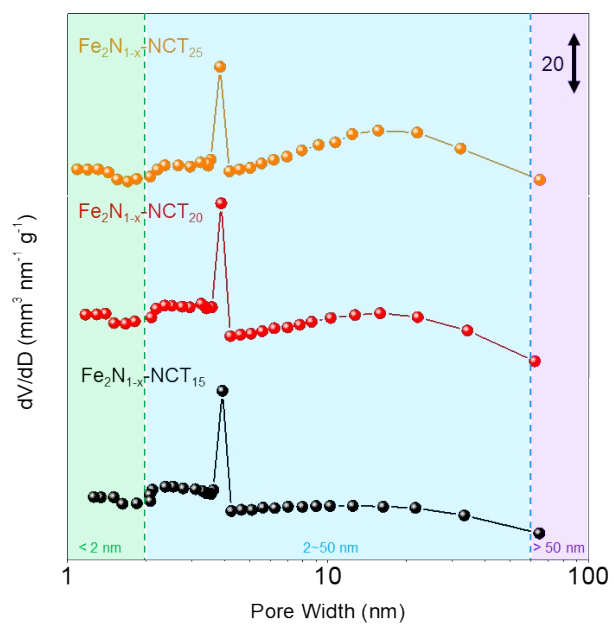

Figure S10. Pore size distribution of Fe<sub>2</sub>N<sub>1-x</sub>-NCT of different diameters.

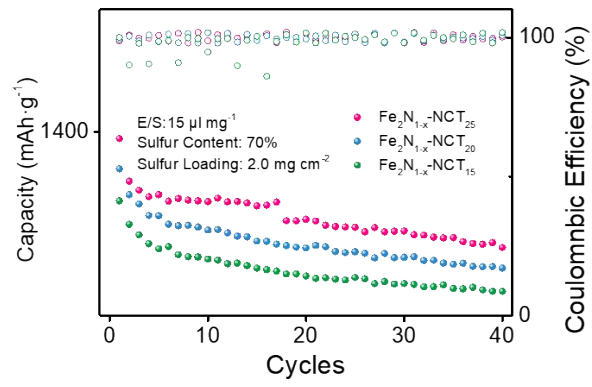

Figure S11. Cycling performances at 0.1 C of LSBs with  $\text{Fe}_2\text{N}_{1-x}\text{-NCT}$  hosts (with raised polystyrene concentration) under sulfur loading of  $2.0 \text{ mg}\cdot\text{cm}^{-2}$ .

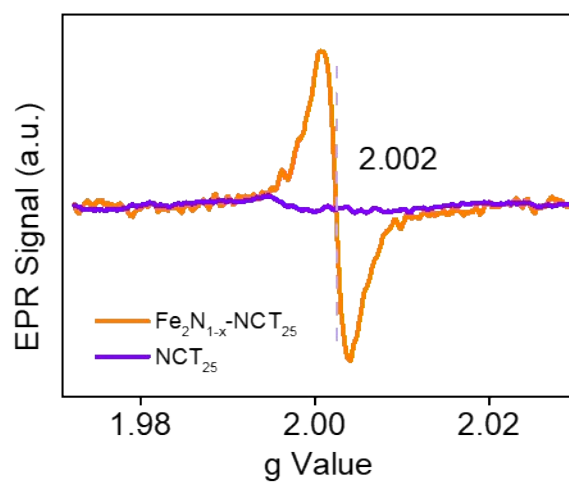

Figure S12. EPR pattern of  $\text{Fe}_2\text{N}_{1-x}\text{-NCT}_{25}$  and  $\text{NCT}_{25}$ .

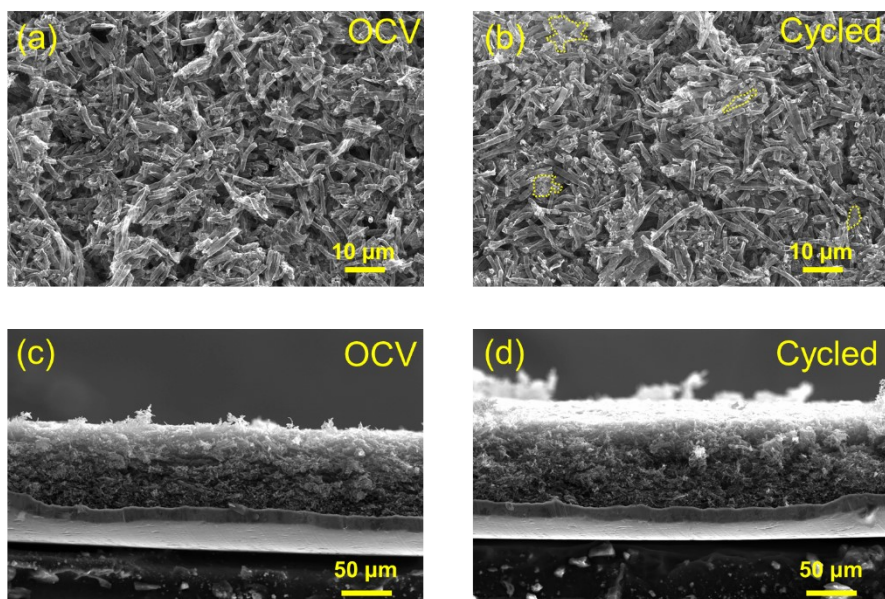

Figure S13. SEM images of (a) fresh  $\text{Fe}_2\text{N}_{1-x}\text{-NCT}_{25}/\text{S}$  cathode and (b) cycled  $\text{Fe}_2\text{N}_{1-x}\text{-NCT}_{25}/\text{S}$  cathode, cross-section SEM images of (c) fresh  $\text{Fe}_2\text{N}_{1-x}\text{-NCT}_{25}/\text{S}$  cathode and (d) cycled  $\text{Fe}_2\text{N}_{1-x}\text{-NCT}_{25}/\text{S}$  cathode. (Observable sulfur particles in yellow circles).

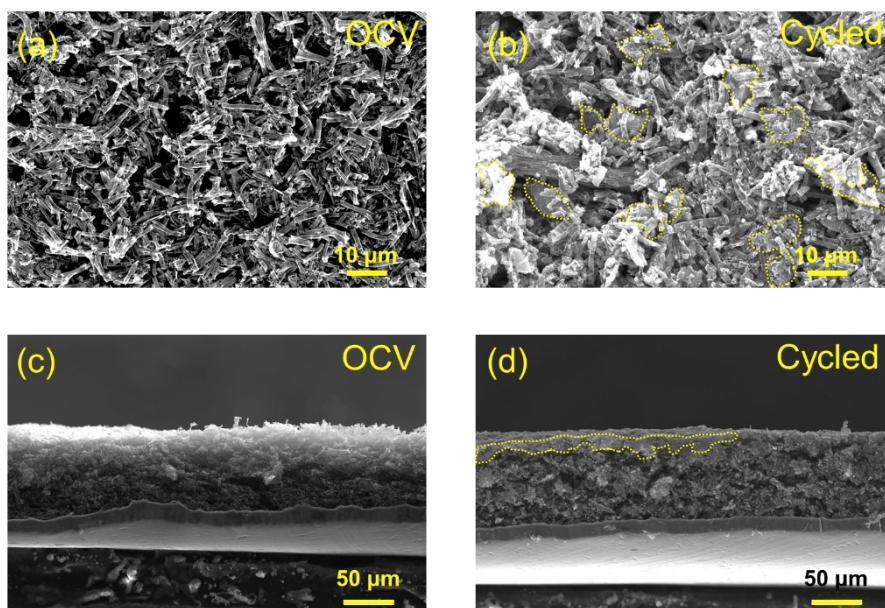

Figure S14. SEM images of (a) fresh NCT<sub>25</sub>/S cathode and (b) cycled NCT<sub>25</sub>/S cathode, cross-section SEM images of (c) fresh NCT<sub>25</sub>/S cathode and (d) cycled NCT<sub>25</sub>/S cathode. (Observable sulfur particles in yellow circles).

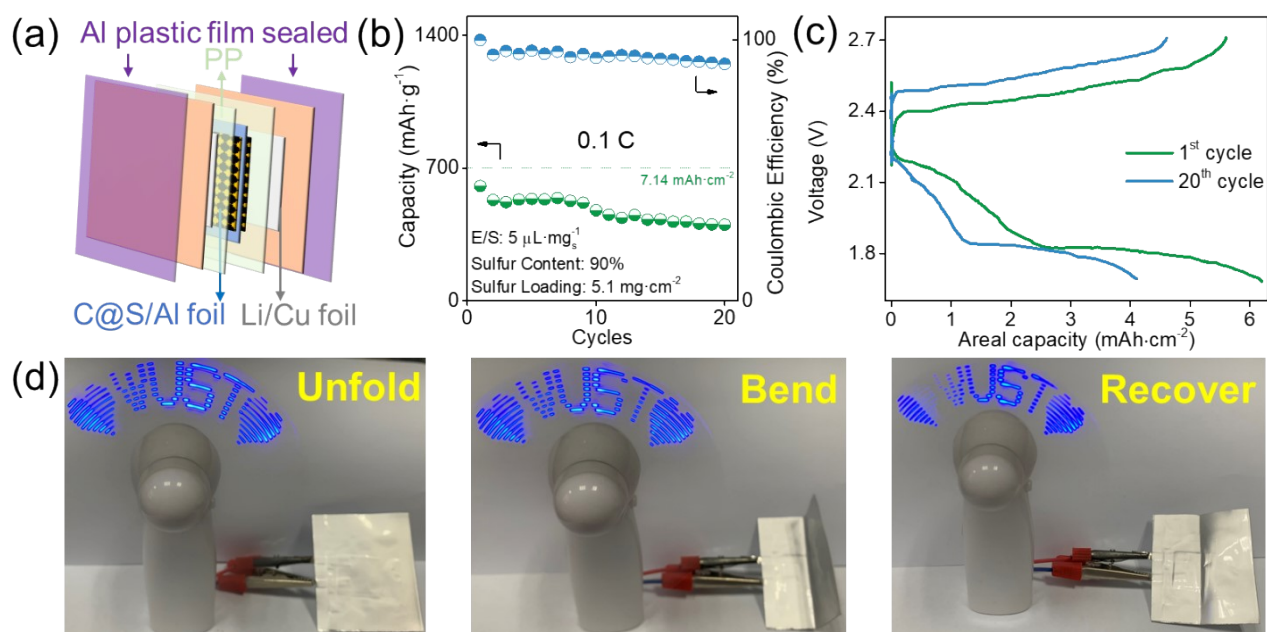

Figure S15. (a) Assembling scheme of a Li-S punch cell. (b) Cycling performance and (c) voltage profiles of the  $\text{Fe}_2\text{N}_{1-x}\text{-NCT}_{25}/\text{S}$  cathode assembled punch cell at 0.1 C. (d) A Li-S punch cell supported LED fan worked when cell was unfolded (left), bended (middle), and recovered (right).

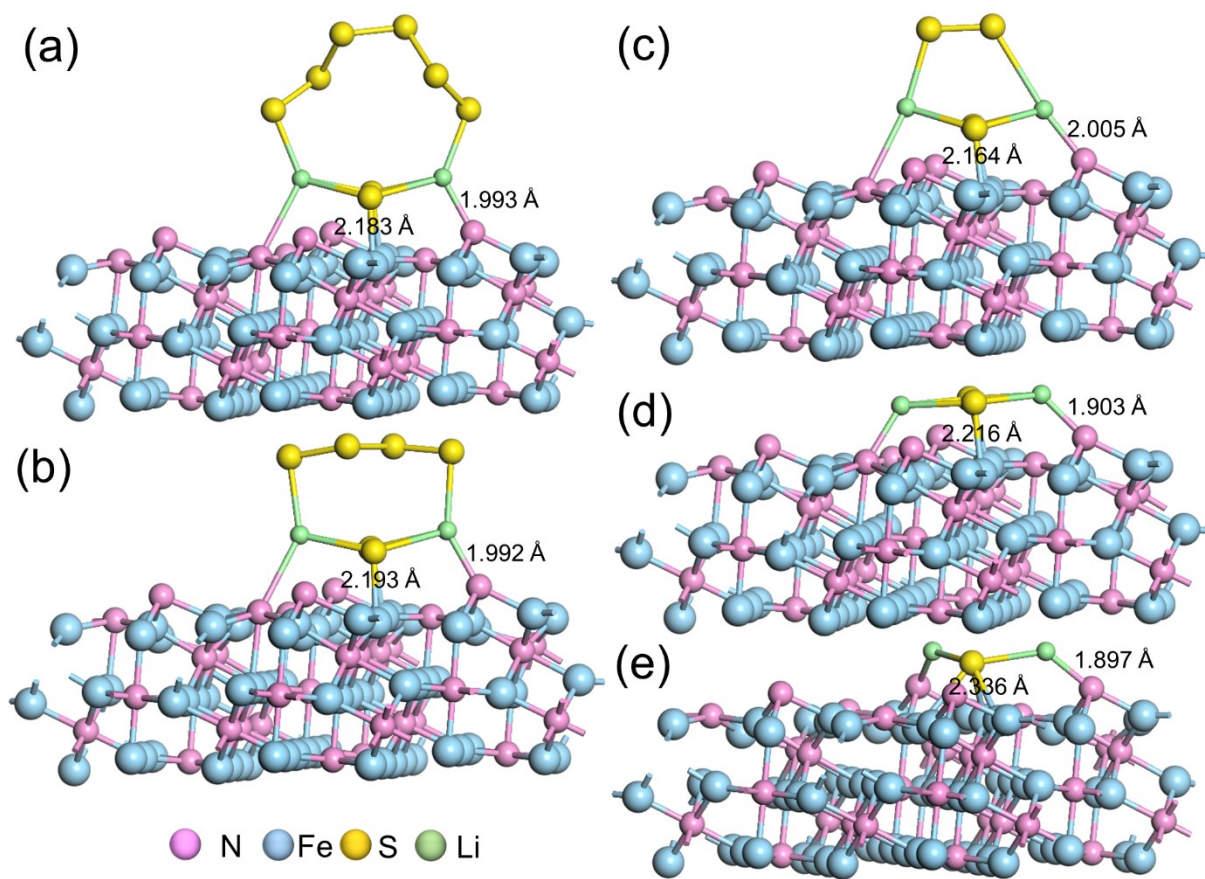

Figure S16. DFT calculation results of optimized geometrical configurations of (a) Li<sub>2</sub>S<sub>8</sub>, (b) Li<sub>2</sub>S<sub>6</sub>, (c) Li<sub>2</sub>S<sub>4</sub>, (d) Li<sub>2</sub>S<sub>2</sub>, (e) Li<sub>2</sub>S molecules on the nitrogen deficient Fe<sub>2</sub>N<sub>1-x</sub> ( $\bar{1}\bar{1}0$ ) surface model.



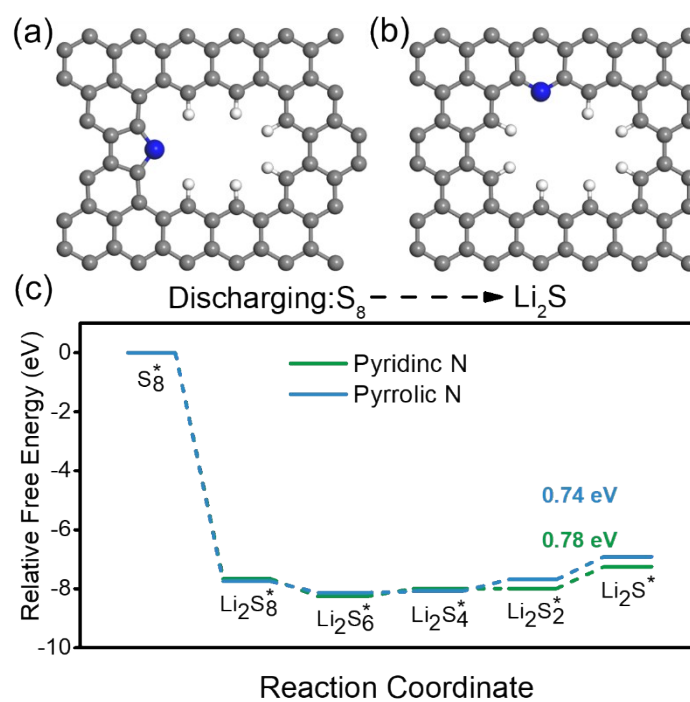

Figure S17. Structures of (a) pyrrolic N-doped and (b) pyridinic N-doped NCT used in first-principles calculations. The white, grey, yellow, blue, and purple balls represent H, C, N, and Li atoms, respectively. (c) Free energy diagrams for the reduction of LiPSs near the pyrrolic N and pyridinic N defects.

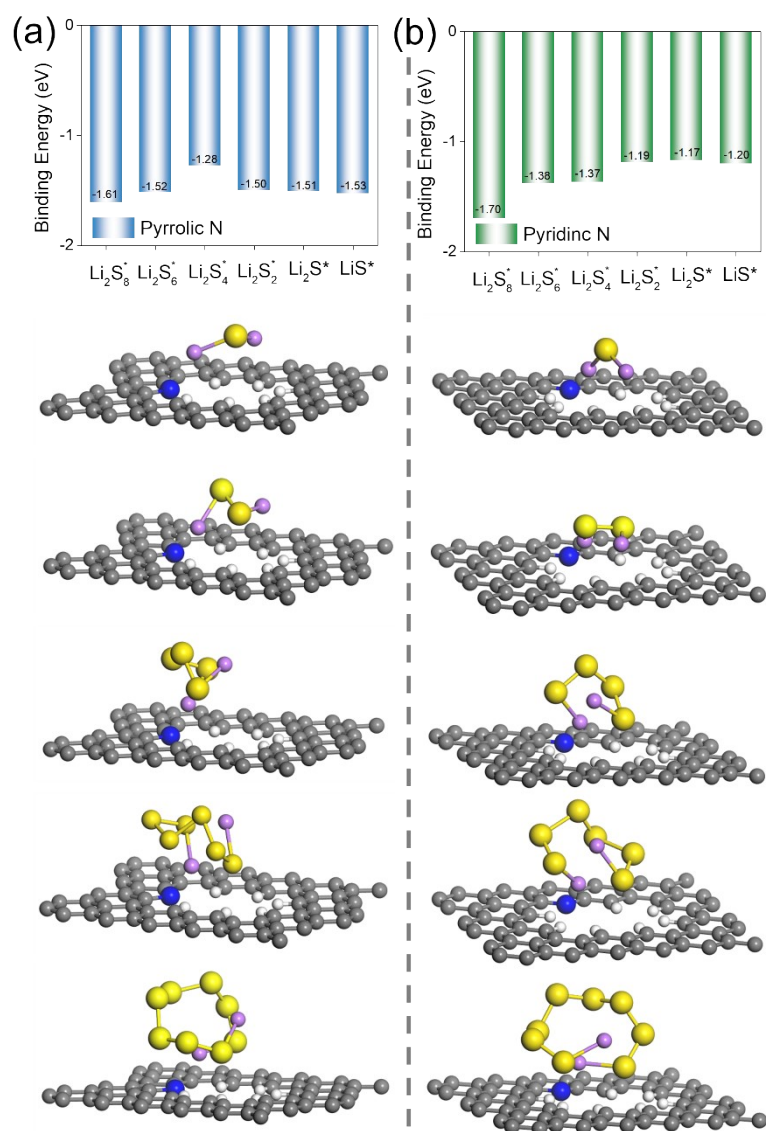

Figure S18. Adsorption energy of LiPSs on (a) pyrrolic N-doped or (b) pyridinic N-doped NCT. Geometrically stable configurations of  $\text{Li}_2\text{S}$ ,  $\text{Li}_2\text{S}_2$ ,  $\text{Li}_2\text{S}_4$ ,  $\text{Li}_2\text{S}_6$ , and  $\text{Li}_2\text{S}_8$  on pyridinic N-doped or pyrrolic N-doped NCT (from up to down).

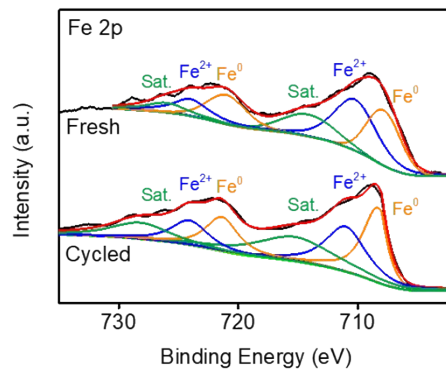

Figure S19. The high-resolution XPS spectra of Fe 2p for Fe<sub>2</sub>N<sub>1-x</sub>-NCT<sub>25</sub> sample before and after cell cycling.

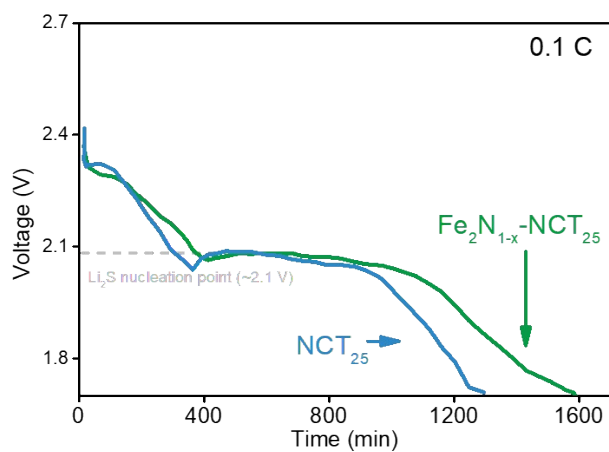

Figure S20. The voltage profiles of  $\text{Fe}_2\text{N}_{1-x}\text{-NCT}_{25}/\text{S}$  cathode and  $\text{NCT}_{25}/\text{S}$  cathode at 0.1 C for discharging.

#### References

- [1] Y. Boyjoo, H. Shi, E. Olsson, *Adv. Energy Mater.* 2020, **10**, 2000651.
- [2] Y. Wei, B. Wang, Y. Zhang, *Adv. Funct. Mater.* 2021, **31**, 2006033.
- [3] X. Wang, D. Luo, J. Wang, *Angew. Chem. Int. Ed.* 2021, **60**, 2371-2378.
- [4] R. Li, H. Peng, Q. Wu, *Angew. Chem. Int. Ed.* 2020, **59**, 12129-12138.
- [5] Y. Zhang, G. Li, J. Wang, *Adv. Energy Mater.* 2021, **11**, 2100497
